# Supplementary material for: Promising Biomarkers of Environmental Enteric Dysfunction: A Prospective Cohort study in Pakistani Children
Source: PubMed Central journal article supplement (PMC5813024; doi:10.1038/s41598-018-21319-8), 2018-02-14

**Title: Promising Biomarkers of Environmental Enteric Dysfunction: A Prospective Cohort study in Pakistani Children**

<sup>1,2</sup>Najeeha Talat Iqbal, <sup>1</sup>Kamran Sadiq, <sup>1,3</sup>Sana Syed, <sup>1</sup>Tauseefullah Akhund, <sup>1</sup>Fayyaz Umrani, <sup>1</sup>Sheraz Ahmed, <sup>1</sup>Mohammad Yawar Yakoob, <sup>1</sup>Najeeb Rahman, <sup>1</sup>Shahida Qureshi, <sup>4</sup>Wenjun Xin, <sup>4</sup>Jennie Z. Ma, <sup>5</sup>Molly Hughes, <sup>1</sup>Syed Asad Ali.

<sup>1</sup>Department of Pediatrics and Child Health, Aga Khan University, Karachi, Pakistan.

<sup>2</sup>Department of Biological and Biomedical Sciences, Aga Khan University, Karachi, Pakistan.

<sup>3</sup> Department of Pediatrics, University of Virginia, Charlottesville, VA, USA.

<sup>4</sup>Department of Public Health Sciences, University of Virginia, USA.

<sup>5</sup>Department of Medicine, University of Virginia, USA.

**Table S1. FDR for all 8 Biomarkers in trend test with median value from each quartile**

|         | Biomarker | Raw_pvalue | FDR    |
|---------|-----------|------------|--------|
| 6 month | IGF1      | 0.0000     | 0.0000 |
|         | Ferritin  | 0.0000     | 0.0000 |
|         | MPO       | 0.0020     | 0.0053 |
|         | GLP2      | 0.0179     | 0.0357 |
|         | NEO       | 0.0612     | 0.0780 |
|         | CRP       | 0.0680     | 0.0780 |
|         | AGP       | 0.0683     | 0.0780 |
|         | reg1stool | 0.6949     | 0.6949 |
| 9 month | IGF1      | 0.0000     | 0.0000 |
|         | Ferritin  | 0.0000     | 0.0000 |
|         | AGP       | 0.0045     | 0.0119 |
|         | CRP       | 0.0197     | 0.0394 |
|         | GLP2      | 0.0283     | 0.0453 |
|         | NEO       | 0.0412     | 0.0549 |
|         | MPO       | 0.2647     | 0.3025 |
|         | reg1stool | 0.6460     | 0.6460 |

**Table S2. A. Association of slope of HAZ with continuous estimation of biomarker of systemic inflammation at 6 and 9 month**

| Biomarker        | 6 month                          |                   | 9 month                          |                   |
|------------------|----------------------------------|-------------------|----------------------------------|-------------------|
|                  | Year*Biomarker<br>(slope of LAZ) | pvalue            | Year*Biomarker<br>(slope of LAZ) | pvalue            |
| Ferritin (ng/ml) | -0.00405                         | <b>&lt;0.0001</b> | -0.00607                         | <b>&lt;0.0001</b> |
| CRP (mg/L)       | -0.14416                         | <b>0.0156</b>     | -0.11414                         | <b>0.0051</b>     |
| AGP (mg/dL)      | -0.00239                         | <b>0.0299</b>     | -0.00346                         | <b>0.0005</b>     |
| IGF-1 (ng/ml)    | 0.00997                          | <b>&lt;0.0001</b> | 0.01219                          | <b>&lt;0.0001</b> |

**Table S2. B. Association of slope of HAZ with continuous estimation of biomarker of intestinal inflammation at 6 and 9 month**

| Biomarker     | 6 month                          |              | 9 month                          |        |
|---------------|----------------------------------|--------------|----------------------------------|--------|
|               | Year*Biomarker<br>(slope of LAZ) | pvalue       | Year*Biomarker<br>(slope of LAZ) | pvalue |
| GLP (pg/ml)   | 1.19819E-06                      | 0.4928       | -7.00217E-06                     | 0.1543 |
| MPO (ng/ml)   | -5.202E-06                       | <b>0.029</b> | -5.47886E-06                     | 0.1014 |
| NEO (nmol/L)  | -2.40887E-05                     | 0.7743       | 3.59536E-06                      | 0.9650 |
| Reg1b (pg/ml) | -4.52741E-05                     | 0.8316       | 0.000111421                      | 0.5426 |

Beta estimates of longitudinal LAZ score are shown as change in LAZ per year with continuous biomarker. Negative estimates represent the decline in growth with simultaneous change in overall biomarker profile. Data was controlled for covariates such as sex, pre-term birth, maternal age, maternal education and antibiotic use.

**Table S3** ROC analysis of biomarkers at 6 and 9 months in children with HAZ<-1.0 and HAZ>0 from birth to 18<sup>th</sup> month

| Biomarkers       | 6 month |             |             | 9 month |             |             |
|------------------|---------|-------------|-------------|---------|-------------|-------------|
|                  | Cutoff  | Sensitivity | Specificity | Cutoff  | Sensitivity | Specificity |
| Ferritin (ng/ml) | >19.55  | 81.3        | 58.5        | >10.76  | 81.8        | 45.2        |
| CRP (mg/L)       | >0.4    | 81.3        | 32.3        | >1.0    | 80          | 37.1        |
| AGP (mg/dL)      | >66.28  | 80.8        | 34.5        | >83.17  | 80.5        | 39          |
| IGF-1 (ng/ml)    | <53.90  | 80.8        | 34.5        | <45.14  | 80          | 47          |
| GLP (pg/ml)      | >12097  | 80.7        | 22          | >4435   | 80          | 22          |
| MPO (ng/ml)      | >4810   | 80.8        | 23.9        | >2611   | 80          | 44          |
| NEO (nmol/L)     | >733    | 82.3        | 19.5        | >304    | 80          | 18          |
| Reg1b (pg/ml)    | >346    | 80.6        | 20.3        | >288    | 81          | 18          |

**Suppl figure 1 : Time line of follow up of cohort from April 2013-May 2015**

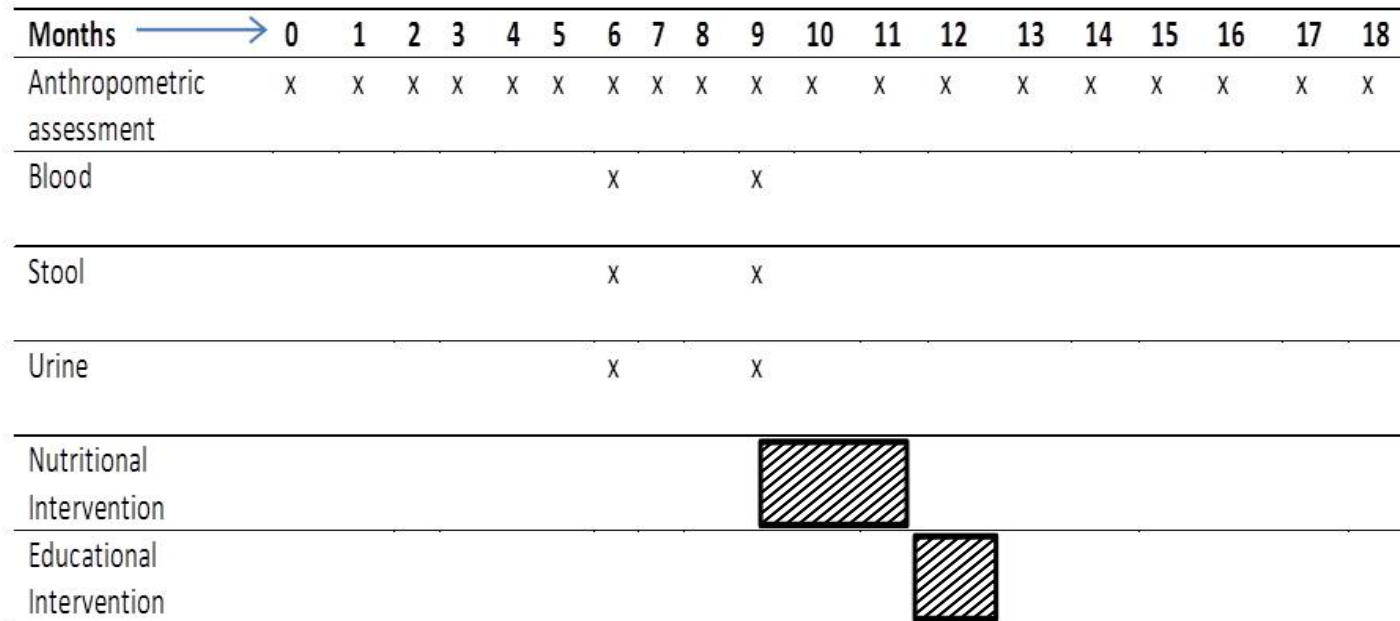

Supplement: 41598_2018_21319_MOESM1_ESM.pdf [file 41598_2018_21319_MOESM1_ESM.pdf]
